# Supplementary material for: Hydrogenstorage materials protected by a polymer shell
Source: Royal Society of Chemistry journal article supplement (doi:10.1039/b920470a), 2009-12-15
Supplement: b920470a.pdf [file b920470a.pdf]

## Supporting information

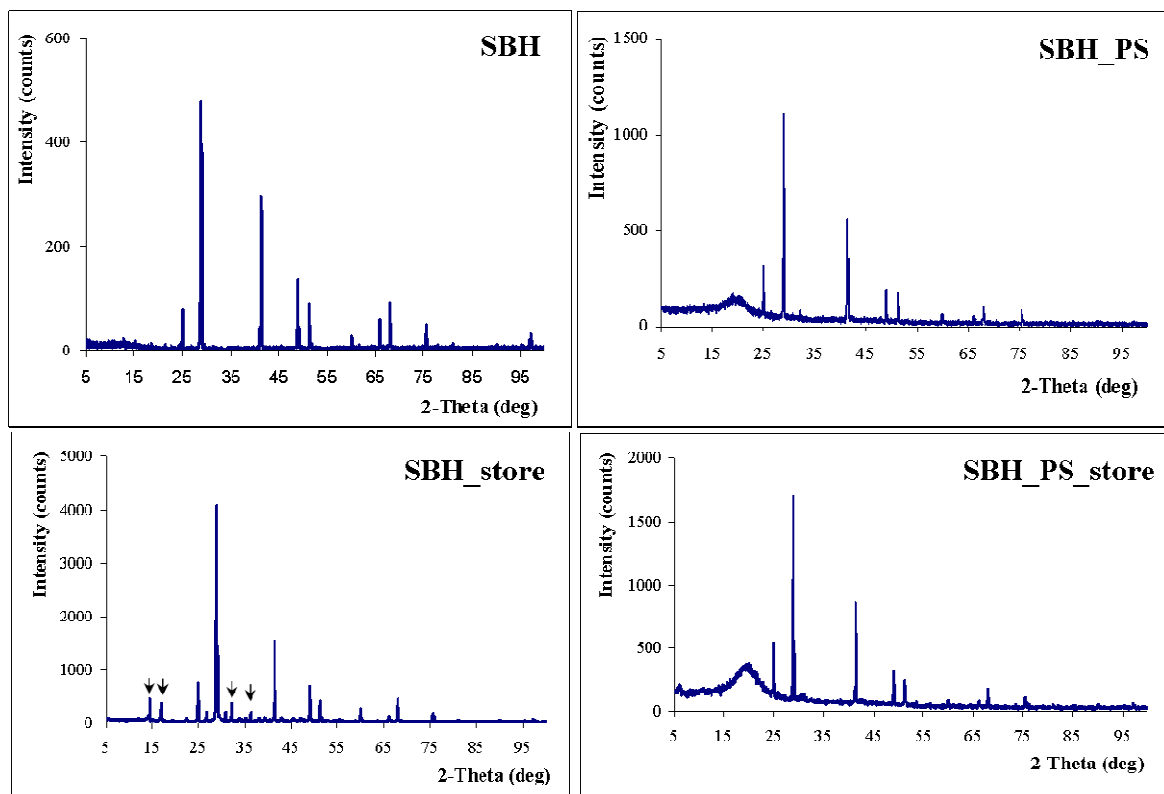

**Figure.** XRD patterns of pristine sodium borohydride and microcontainers before and after storage at outdoor conditions for 4 h. The arrows in the lower left pattern point to peaks developing upon reaction with water. A broad signal at  $2\theta = 20^\circ$  in the microcontainer pattern corresponds to the amorphous PS matrix.<sup>13</sup>
